# Supplementary material
Source: publisher figshare collection journal article supplement (https://acs.figshare.com/ndownloader/files/3737152)
Supplement: Supplementary file 1 [file 3737152]

STOICHIOMETRIC CONTROL OF COCRYSTAL FORMATION BY SOLVENT FREE  
CONTINUOUS COCRYSTALLISATION (SFCC)

*Chaitrali Kulkarni<sup>1</sup>, Clive Wood<sup>1</sup>, Adrian L. Kelly<sup>1</sup>, Tim Gough<sup>1</sup>, Nicholas Blagden<sup>2</sup>, Anant  
R. Paradkar<sup>1\*</sup>*

<sup>1</sup>Centre for Pharmaceutical Engineering Science, University of Bradford,  
Richmond Road, Bradford, BD7 1DP, UK

<sup>2</sup>School of Pharmacy, University of Lincoln, Brayford Pool, Lincolnshire, Lincoln, LN6 7TS,  
UK

## SUPPORTING INFORMATION

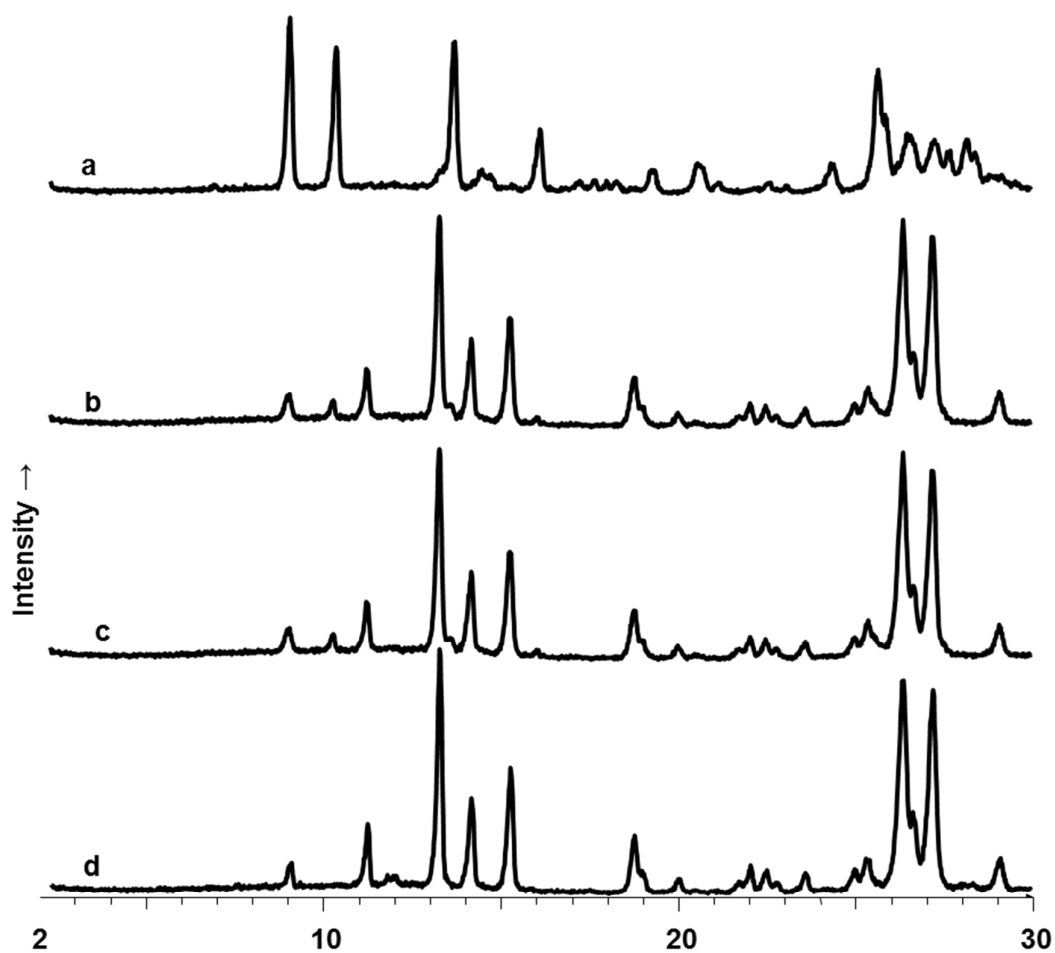

Figure1. PXRD patterns of 2:1 co-crystals from 1:1 caffeine: maleic acid co-crystals processed at different temperature profiles (a) 1:1 co-crystals with maleic acid processed at T110, (b) 1:1 co-crystals with maleic acid processed at T100, (c) 1:1 co-crystals with maleic acid processed at T190 and (d) Pure 1:1 caffeine; maleic acid co-crystals

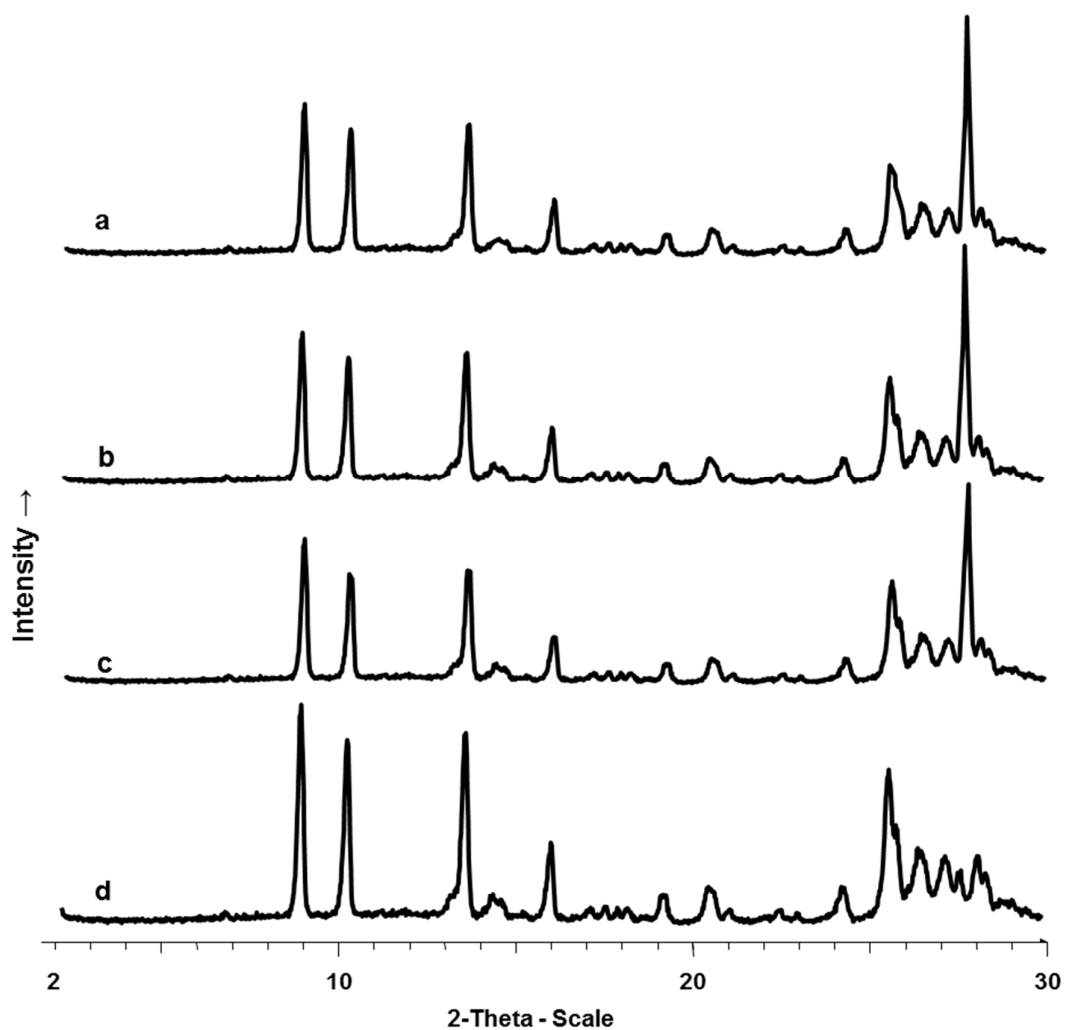

Figure2. PXRD patterns of 2:1 co-crystals with from 1:1 caffeine: maleic acid co-crystals processed at different temperature profiles (a) 2:1 co-crystals with maleic acid processed at T100, (b) 2:1 co-crystals with maleic acid processed at T110, (c) 2:1 co-crystals with maleic acid processed at T120 and (d) Pure 2:1 caffeine: maleic acid co-crystals

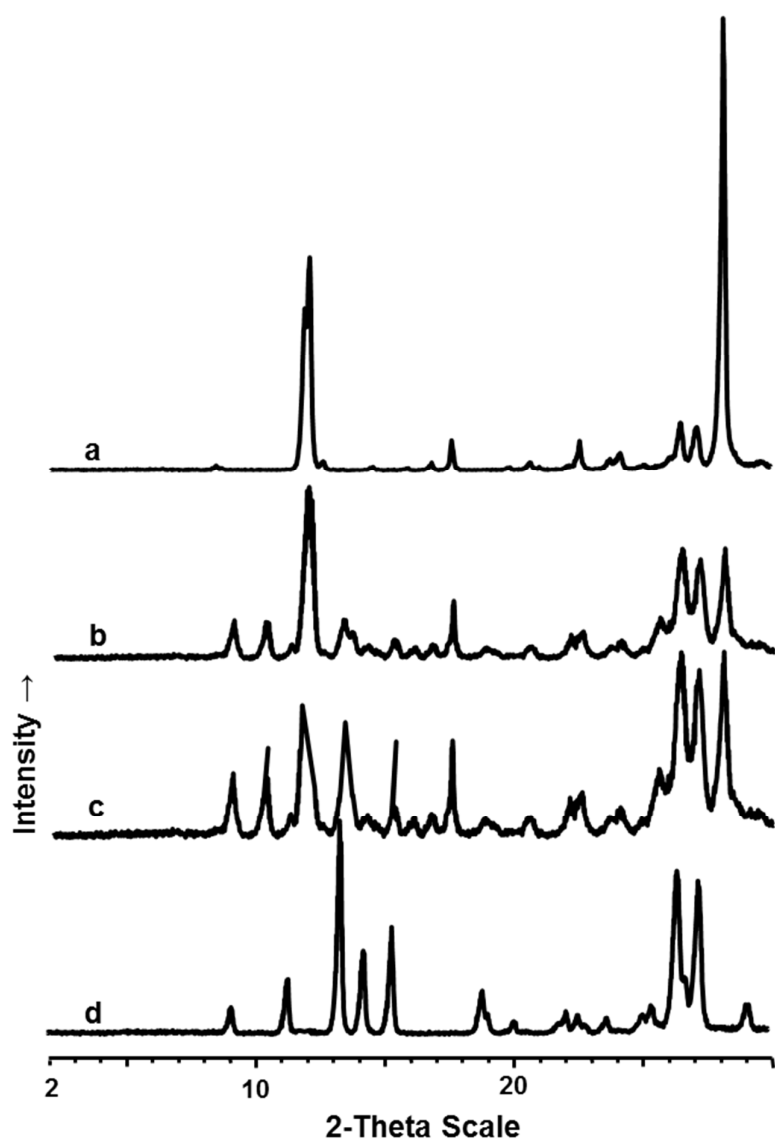

Figure 3. PXRD patterns of sample collected from different zone during extrusion of 1:1 co-crystals (a) sample collected from zones 2-4, (b) sample collected from zones 4-6, (c) sample collected from zones 6-8 and (d) samples collected from zones 8-10

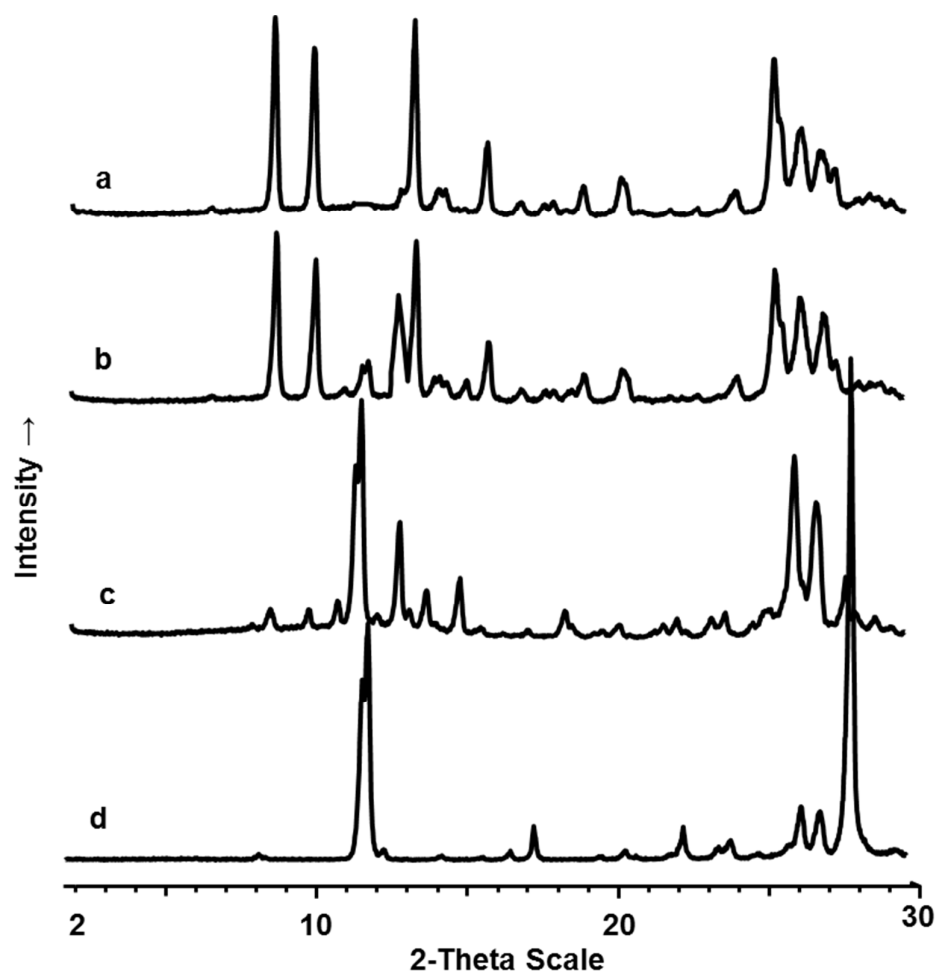

Figure 4. PXRD patterns of sample collected from different zone during extrusion of 2:1 co-crystals (a) samples collected from zones 2-4, (b) samples collected from zones 4-6, (c) samples collected from zones 6-8 and (d) samples collected from zones 8-10

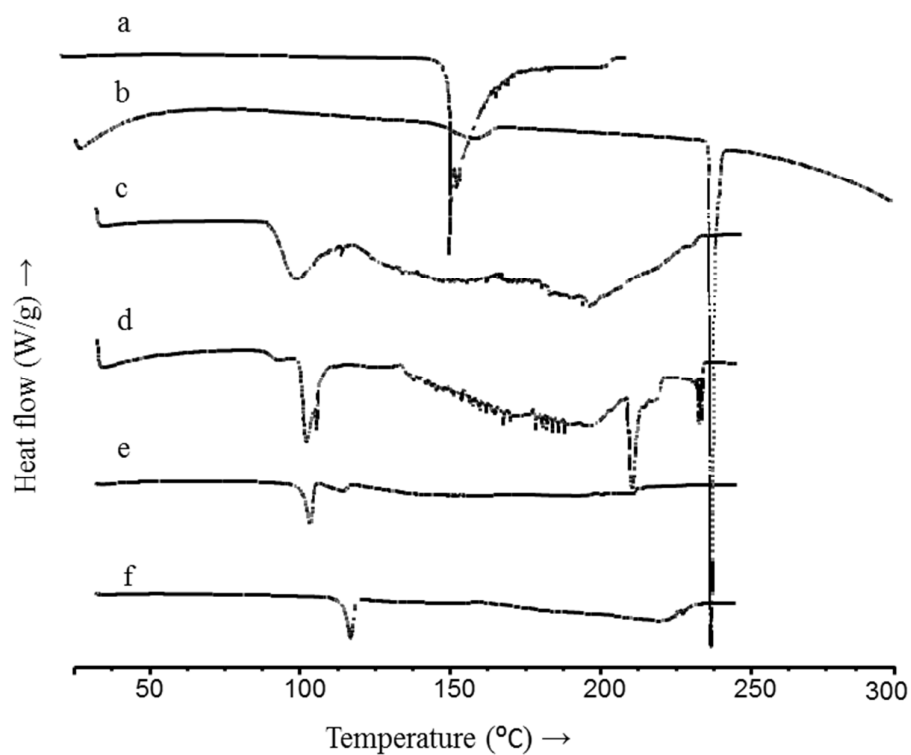

Figure 5.DSC thermograms for (a) maleic acid, (b) anhydrous  $\beta$ -caffeine, (c) physical mixture (1:1), and (d) physical mixture (2:1), (e) caffeine/maleic acid 1:1 co-crystals and (f) caffeine/maleic acid 2:1 co-crystals

Table 1. Temperature profiles across the different zones of the extruder barrel

| Code        | Zone 10 | Zone 9 | Zone 8 | Zone 7 | Zone 6 | Zone 5 | Zone 4 | Zone 3 | Zone 2 |
|-------------|---------|--------|--------|--------|--------|--------|--------|--------|--------|
| <b>T90</b>  | 50      | 70     | 90     | 80     | 70     | 55     | 40     | 35     | 25     |
| <b>T100</b> | 50      | 80     | 100    | 90     | 80     | 55     | 40     | 35     | 25     |
| <b>T105</b> | 50      | 90     | 105    | 100    | 80     | 55     | 40     | 35     | 25     |
| <b>T110</b> | 60      | 100    | 110    | 100    | 80     | 60     | 40     | 35     | 25     |
| <b>T120</b> | 90      | 110    | 120    | 110    | 100    | 90     | 75     | 35     | 25     |

Table 2: Co-crystallisation experimental detail showing resultant products

| Batch<br>code    | Gram/batch |             | Temp.<br>Coding | Screw<br>Speed | Product<br>(major + minor) |
|------------------|------------|-------------|-----------------|----------------|----------------------------|
|                  | Caffeine   | Maleic acid |                 |                |                            |
| Caf:Mal<br>(1:1) | 194        | 116         | T100            | 10             | CC                         |
|                  |            |             | T90             | 10             | CC + Caffeine              |
|                  |            |             | T80             | 10             | Caffeine + CC              |
| Caf:Mal<br>(2:1) | 388        | 116         | T110            | 10             | CC                         |
|                  |            |             | T105            | 10             | CC + Caffeine              |
|                  |            |             | T100            | 10             | Caffeine + CC              |
